# Supplementary material for: LTα, TNF, and ILC3 in Peyer’s Patch Organogenesis
Source: MDPI journal article supplement (doi:10.3390/cells11121970), 2022-06-19
Supplement: s1 [file s1]

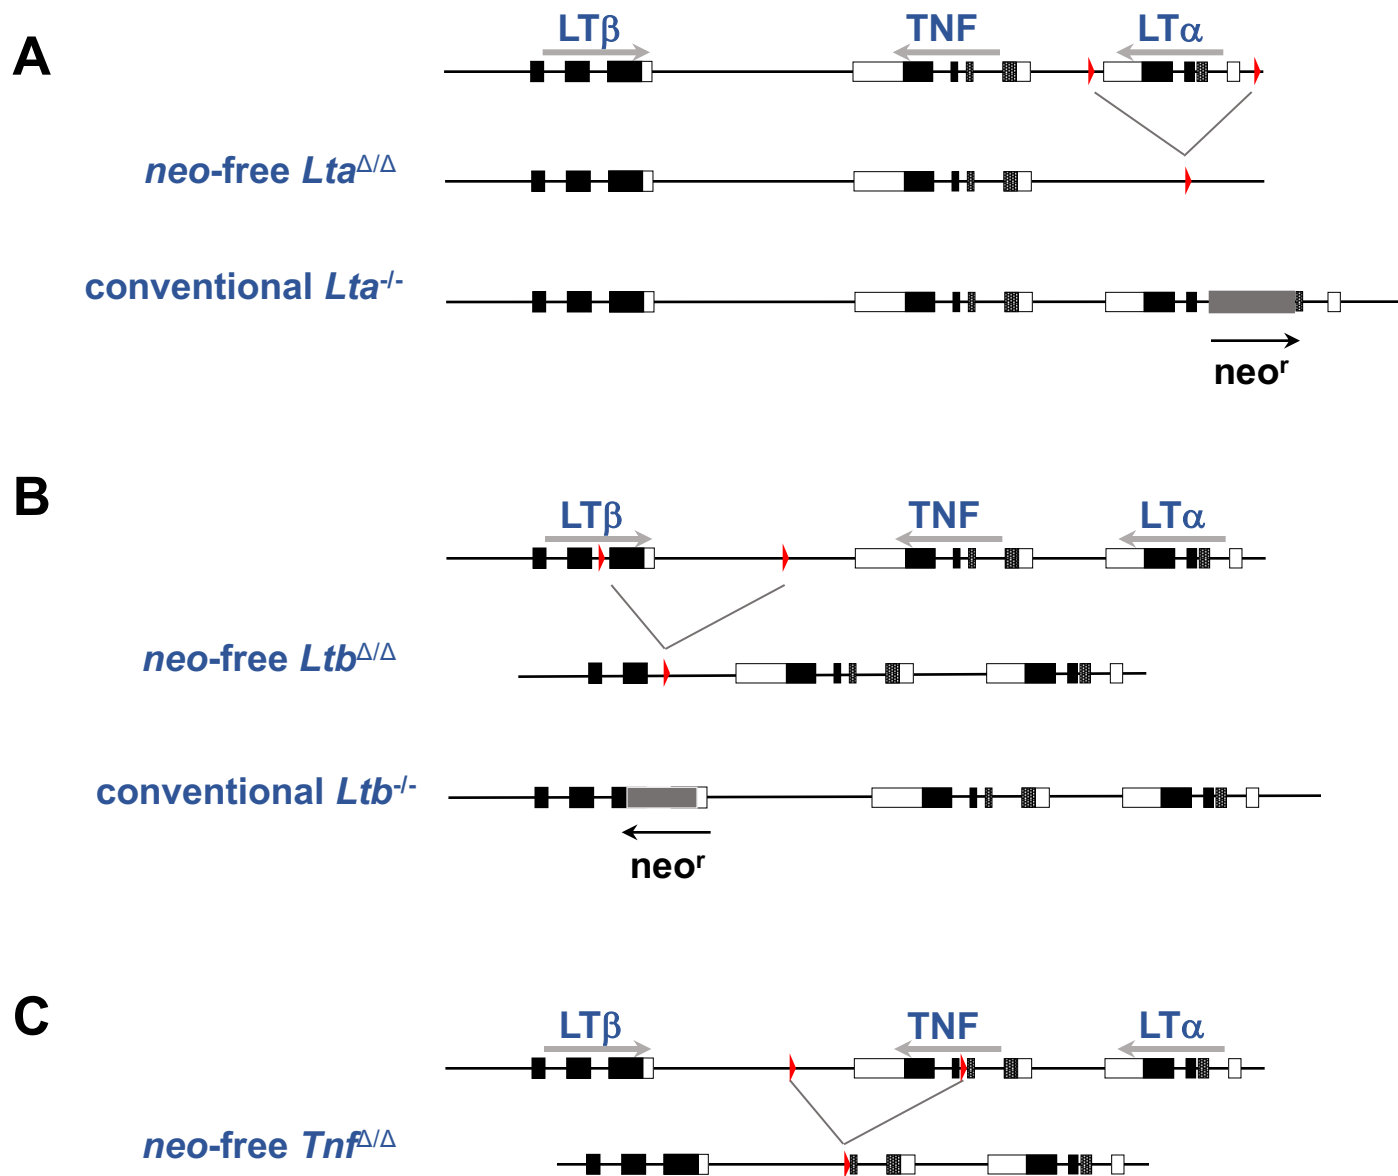

**Figure S1:** Comparison of different LT $\alpha$ , LT $\beta$  and TNF genes targeting strategies. Schematic representation of wild-type TNF/LT locus and **(A)** *neo-free* and conventional *Lta*-deficient mice, **(B)** *neo-free* and conventional *Ltb*-deficient mice, **(C)** *neo-free* *Tnf*-deficient mice.

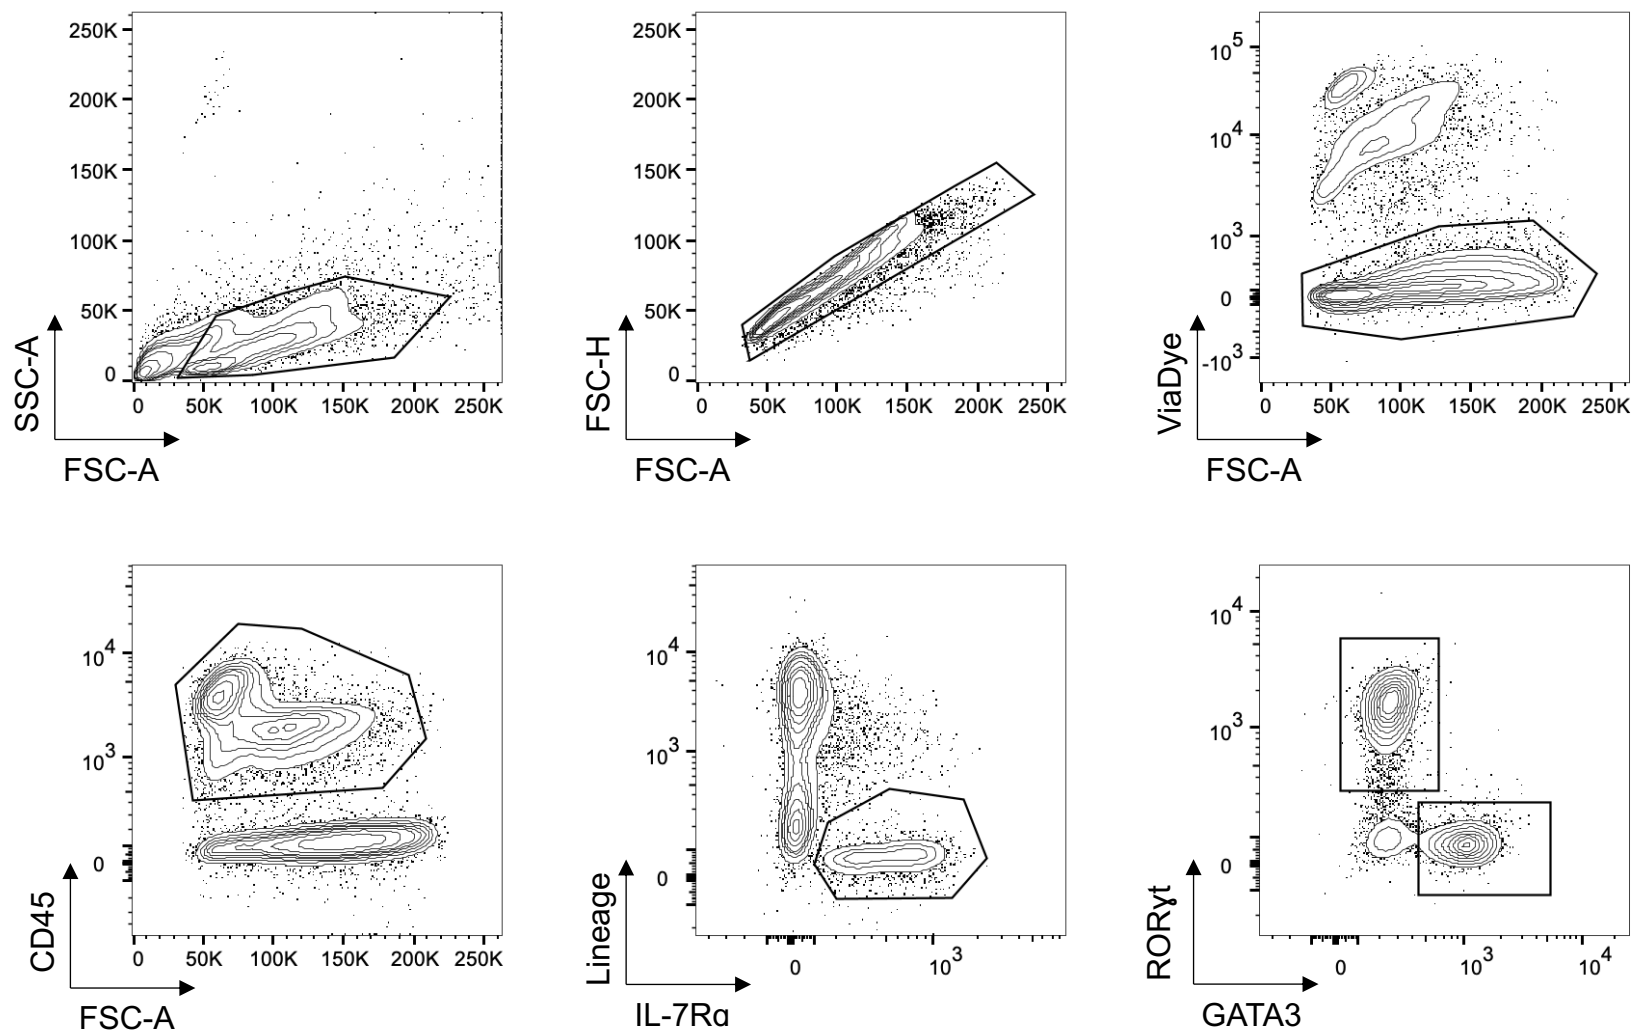

**Figure S2:** Flow cy-tometry gating strategy for identification of ILC subsets in the lamina propria of the small intestine. ILC3 were identified as  $\text{ViaDye}^- \text{CD45}^+ \text{Lin}^- \text{IL-7R}\alpha^+ \text{ROR}\gamma\text{t}^+$  cells.
